# Supplementary material
Source: publisher figshare collection journal article supplement (https://tandf.figshare.com/articles/dataset/_/6321782)
Supplement: Supplementary file 2 [file 1]

Table S1: Details of location, date and duration of each active acoustic survey and the species relative activity data. The relative activity level of each species detected is shown as the total number of 1-min intervals during which each species was recorded during the nightly survey. Geographical location of the site code corresponds to the map in Figure S1.

| <b>Summer, 2012</b> |           |                  |                                            |                  |                        |                          |                    |                        |                   |                    |
|---------------------|-----------|------------------|--------------------------------------------|------------------|------------------------|--------------------------|--------------------|------------------------|-------------------|--------------------|
| Date Surveyed       | Site Code | Total Survey Min | <i>Relative activity (1-min intervals)</i> |                  |                        |                          |                    |                        |                   |                    |
|                     |           |                  | <i>H. savii</i>                            | <i>P. kuhlii</i> | <i>P. pipistrellus</i> | <i>Pipistrellus.spp.</i> | <i>P. gaisleri</i> | <i>R. hipposideros</i> | <i>M. punicus</i> | <i>T. teniotis</i> |
| 24/08/2012          | <b>A1</b> | 145              | 20                                         | 13               | 34                     | 20                       | 0                  | 0                      | 1                 | 0                  |
| 03/07/2012          | <b>A2</b> | 75               | 23                                         | 7                | 24                     | 4                        | 0                  | 0                      | 0                 | 0                  |
| 05/07/2012          | <b>A3</b> | 145              | 18                                         | 21               | 48                     | 13                       | 0                  | 0                      | 0                 | 0                  |
| 04/09/2012          | <b>A4</b> | 129              | 8                                          | 22               | 29                     | 6                        | 0                  | 0                      | 0                 | 0                  |
| 07/09/2012          | <b>A5</b> | 107              | 7                                          | 25               | 11                     | 3                        | 0                  | 0                      | 0                 | 0                  |
| 11/09/2012          | <b>C1</b> | 157              | 38                                         | 10               | 21                     | 4                        | 2                  | 0                      | 1                 | 0                  |
| 25/08/2012          | <b>C2</b> | 123              | 15                                         | 3                | 4                      | 2                        | 0                  | 0                      | 0                 | 0                  |
| 13/07/2012          | <b>C3</b> | 143              | 30                                         | 7                | 1                      | 0                        | 0                  | 0                      | 0                 | 0                  |
| 29/07/2012          | <b>C4</b> | 145              | 38                                         | 10               | 6                      | 1                        | 0                  | 0                      | 0                 | 0                  |
| 13/08/2012          | <b>C5</b> | 150              | 24                                         | 11               | 15                     | 4                        | 0                  | 0                      | 0                 | 0                  |
| 09/09/2012          | <b>S1</b> | 135              | 23                                         | 10               | 15                     | 2                        | 0                  | 0                      | 0                 | 0                  |
| 04/07/2012          | <b>S2</b> | 150              | 1                                          | 20               | 10                     | 2                        | 0                  | 0                      | 0                 | 0                  |
| 06/09/2012          | <b>S3</b> | 151              | 1                                          | 1                | 0                      | 0                        | 0                  | 0                      | 0                 | 0                  |
| 06/08/2012          | <b>S4</b> | 135              | 11                                         | 6                | 3                      | 8                        | 0                  | 0                      | 0                 | 0                  |
| 19/07/2012          | <b>S5</b> | 139              | 19                                         | 30               | 4                      | 1                        | 0                  | 0                      | 0                 | 0                  |
| 27/08/2012          | <b>U1</b> | 167              | 2                                          | 3                | 7                      | 0                        | 0                  | 0                      | 0                 | 0                  |
| 28/08/2012          | <b>U2</b> | 136              | 0                                          | 2                | 2                      | 1                        | 0                  | 0                      | 0                 | 0                  |
| 30/07/2012          | <b>U3</b> | 190              | 2                                          | 0                | 4                      | 1                        | 0                  | 0                      | 0                 | 0                  |
| 20/07/2012          | <b>U4</b> | 98               | 18                                         | 1                | 16                     | 2                        | 0                  | 0                      | 0                 | 0                  |
| 28/07/2012          | <b>U5</b> | 125              | 6                                          | 1                | 21                     | 8                        | 0                  | 0                      | 0                 | 0                  |
| 23/08/2012          | <b>V1</b> | 121              | 37                                         | 12               | 10                     | 5                        | 1                  | 0                      | 1                 | 0                  |

---

**Summer, 2012 cont.**

| Date Surveyed | Site Code  | Total Survey Min | <i>Relative activity (1-min intervals)</i> |                  |                        |                          |                    |                        |                   |                    |
|---------------|------------|------------------|--------------------------------------------|------------------|------------------------|--------------------------|--------------------|------------------------|-------------------|--------------------|
|               |            |                  | <i>H. savii</i>                            | <i>P. kuhlii</i> | <i>P. pipistrellus</i> | <i>Pipistrellus.spp.</i> | <i>P. gaisleri</i> | <i>R. hipposideros</i> | <i>M. punicus</i> | <i>T. teniotis</i> |
| 26/07/2012    | <b>V10</b> | 160              | 5                                          | 64               | 92                     | 18                       | 0                  | 0                      | 0                 | 0                  |
| 21/07/2012    | <b>V11</b> | 125              | 27                                         | 16               | 33                     | 5                        | 0                  | 0                      | 1                 | 0                  |
| 08/09/2012    | <b>V3</b>  | 129              | 8                                          | 5                | 14                     | 9                        | 0                  | 0                      | 0                 | 0                  |
| 08/08/2012    | <b>V9</b>  | 133              | 21                                         | 16               | 26                     | 8                        | 0                  | 2                      | 0                 | 0                  |
| 11/07/2012    | <b>V2</b>  | 131              | 1                                          | 0                | 0                      | 0                        | 0                  | 0                      | 1                 | 0                  |
| 25/07/2012    | <b>V4</b>  | 127              | 5                                          | 28               | 5                      | 1                        | 0                  | 1                      | 0                 | 0                  |
| 07/08/2012    | <b>V5</b>  | 197              | 34                                         | 10               | 20                     | 7                        | 0                  | 0                      | 0                 | 0                  |
| 15/08/2012    | <b>V6</b>  | 155              | 22                                         | 28               | 14                     | 5                        | 1                  | 0                      | 1                 | 0                  |
| 12/07/2012    | <b>V7</b>  | 197              | 30                                         | 18               | 10                     | 4                        | 0                  | 0                      | 1                 | 0                  |
| 21/08/2012    | <b>V8</b>  | 154              | 33                                         | 12               | 14                     | 4                        | 0                  | 0                      | 0                 | 0                  |
| 24/07/2012    | <b>W1</b>  | 190              | 0                                          | 6                | 48                     | 18                       | 0                  | 0                      | 0                 | 0                  |
| 22/08/2012    | <b>W2</b>  | 185              | 8                                          | 65               | 21                     | 4                        | 0                  | 0                      | 2                 | 0                  |
| 20/08/2012    | <b>W3</b>  | 151              | 7                                          | 32               | 23                     | 8                        | 0                  | 1                      | 0                 | 0                  |
| 02/08/2012    | <b>W4</b>  | 139              | 16                                         | 4                | 17                     | 4                        | 0                  | 0                      | 2                 | 0                  |
| 02/07/2012    | <b>W5</b>  | 154              | 7                                          | 56               | 6                      | 0                        | 0                  | 0                      | 0                 | 0                  |

**Autumn, 2012**

| Date Surveyed | Site Code | Total Survey Min | <i>Relative activity (1-min intervals)</i> |                  |                        |                          |                    |                        |                   |                    |
|---------------|-----------|------------------|--------------------------------------------|------------------|------------------------|--------------------------|--------------------|------------------------|-------------------|--------------------|
|               |           |                  | <i>H. savii</i>                            | <i>P. kuhlii</i> | <i>P. pipistrellus</i> | <i>Pipistrellus spp.</i> | <i>P. gaisleri</i> | <i>R. hipposideros</i> | <i>M. punicus</i> | <i>T. teniotis</i> |
| 02/10/2012    | <b>A1</b> | 116              | 11                                         | 0                | 25                     | 9                        | 0                  | 0                      | 0                 | 0                  |
| 08/11/2012    | <b>A2</b> | 108              | 2                                          | 1                | 8                      | 2                        | 1                  | 0                      | 0                 | 0                  |
| 21/11/2012    | <b>A3</b> | 120              | 0                                          | 12               | 19                     | 3                        | 0                  | 0                      | 0                 | 0                  |
| 03/11/2012    | <b>A4</b> | 114              | 2                                          | 7                | 9                      | 7                        | 0                  | 0                      | 0                 | 0                  |
| 16/10/2012    | <b>A5</b> | 120              | 3                                          | 8                | 3                      | 0                        | 0                  | 0                      | 0                 | 0                  |

---

**Autumn, 2012 cont.**

| Date Surveyed | Site Code  | Total Survey Min | Relative activity (1-min intervals) |                  |                        |                          |                    |                        |                   |                    |
|---------------|------------|------------------|-------------------------------------|------------------|------------------------|--------------------------|--------------------|------------------------|-------------------|--------------------|
|               |            |                  | <i>H. savii</i>                     | <i>P. kuhlii</i> | <i>P. pipistrellus</i> | <i>Pipistrellus</i> spp. | <i>P. gaisleri</i> | <i>R. hipposideros</i> | <i>M. punicus</i> | <i>T. teniotis</i> |
| 04/12/2012    | <b>C1</b>  | 128              | 0                                   | 0                | 2                      | 1                        | 0                  | 0                      | 0                 | 0                  |
| 17/10/2012    | <b>C2</b>  | 131              | 2                                   | 0                | 0                      | 0                        | 0                  | 0                      | 0                 | 0                  |
| 12/12/2012    | <b>C3</b>  | 110              | 0                                   | 0                | 2                      | 1                        | 0                  | 1                      | 0                 | 0                  |
| 13/12/2012    | <b>C4</b>  | 101              | 1                                   | 0                | 7                      | 2                        | 0                  | 0                      | 0                 | 0                  |
| 14/12/2012    | <b>C5</b>  | 140              | 1                                   | 0                | 5                      | 0                        | 1                  | 0                      | 0                 | 0                  |
| 05/10/2012    | <b>S1</b>  | 125              | 18                                  | 1                | 19                     | 3                        | 0                  | 0                      | 0                 | 0                  |
| 25/09/2012    | <b>S2</b>  | 121              | 2                                   | 27               | 16                     | 1                        | 0                  | 0                      | 0                 | 0                  |
| 02/11/2012    | <b>S3</b>  | 120              | 0                                   | 2                | 2                      | 1                        | 0                  | 0                      | 0                 | 0                  |
| 15/12/2012    | <b>S5</b>  | 121              | 2                                   | 31               | 33                     | 8                        | 0                  | 0                      | 1                 | 0                  |
| 08/10/2012    | <b>U1</b>  | 110              | 1                                   | 0                | 4                      | 2                        | 0                  | 0                      | 0                 | 0                  |
| 17/11/2012    | <b>U2</b>  | 105              | 0                                   | 0                | 4                      | 1                        | 0                  | 0                      | 0                 | 0                  |
| 26/09/2012    | <b>U3</b>  | 126              | 0                                   | 0                | 7                      | 0                        | 0                  | 0                      | 0                 | 0                  |
| 11/12/2012    | <b>U4</b>  | 102              | 0                                   | 0                | 1                      | 0                        | 0                  | 0                      | 0                 | 0                  |
| 16/12/2012    | <b>U5</b>  | 105              | 0                                   | 0                | 0                      | 0                        | 0                  | 0                      | 0                 | 0                  |
| 27/11/2012    | <b>V1</b>  | 134              | 3                                   | 4                | 10                     | 0                        | 0                  | 0                      | 1                 | 0                  |
| 11/10/2012    | <b>V10</b> | 112              | 10                                  | 17               | 59                     | 3                        | 0                  | 0                      | 0                 | 0                  |
| 01/11/2012    | <b>V11</b> | 124              | 9                                   | 6                | 47                     | 13                       | 0                  | 0                      | 2                 | 0                  |
| 06/11/2012    | <b>V3</b>  | 124              | 3                                   | 6                | 10                     | 1                        | 0                  | 0                      | 0                 | 0                  |
| 09/11/2012    | <b>V2</b>  | 113              | 0                                   | 1                | 1                      | 0                        | 0                  | 0                      | 0                 | 0                  |
| 30/10/2012    | <b>V5</b>  | 118              | 3                                   | 7                | 6                      | 3                        | 0                  | 0                      | 0                 | 0                  |
| 07/11/2012    | <b>V6</b>  | 120              | 0                                   | 6                | 4                      | 1                        | 0                  | 0                      | 0                 | 0                  |
| 05/11/2012    | <b>V7</b>  | 123              | 20                                  | 23               | 12                     | 1                        | 0                  | 0                      | 0                 | 0                  |
| 24/10/2012    | <b>V8</b>  | 150              | 11                                  | 4                | 9                      | 0                        | 1                  | 0                      | 1                 | 0                  |
| 16/11/2012    | <b>W1</b>  | 118              | 0                                   | 2                | 25                     | 0                        | 0                  | 0                      | 0                 | 0                  |
| 10/12/2012    | <b>W2</b>  | 132              | 0                                   | 0                | 0                      | 0                        | 0                  | 0                      | 0                 | 0                  |

---

**Autumn, 2012 cont.**

| Date Surveyed | Site Code | Total Survey Min | Relative activity (1-min intervals) |                  |                        |                          |                    |                        |                   |                    |
|---------------|-----------|------------------|-------------------------------------|------------------|------------------------|--------------------------|--------------------|------------------------|-------------------|--------------------|
|               |           |                  | <i>H. savii</i>                     | <i>P. kuhlii</i> | <i>P. pipistrellus</i> | <i>Pipistrellus</i> spp. | <i>P. gaisleri</i> | <i>R. hipposideros</i> | <i>M. punicus</i> | <i>T. teniotis</i> |
| 07/12/2012    | <b>W3</b> | 132              | 0                                   | 0                | 2                      | 0                        | 0                  | 0                      | 0                 | 0                  |
| 10/11/2012    | <b>W4</b> | 105              | 1                                   | 3                | 6                      | 1                        | 0                  | 0                      | 0                 | 0                  |
| 01/12/2012    | <b>W5</b> | 127              | 0                                   | 0                | 0                      | 0                        | 0                  | 0                      | 0                 | 0                  |

**Spring, 2013**

| Date Surveyed | Site Code | Total Survey Min | Relative activity (1-min intervals) |                  |                        |                          |                    |                        |                   |                    |
|---------------|-----------|------------------|-------------------------------------|------------------|------------------------|--------------------------|--------------------|------------------------|-------------------|--------------------|
|               |           |                  | <i>H. savii</i>                     | <i>P. kuhlii</i> | <i>P. pipistrellus</i> | <i>Pipistrellus</i> spp. | <i>P. gaisleri</i> | <i>R. hipposideros</i> | <i>M. punicus</i> | <i>T. teniotis</i> |
| 12/04/2013    | <b>A1</b> | 103              | 3                                   | 2                | 13                     | 2                        | 0                  | 0                      | 1                 | 0                  |
| 17/06/2013    | <b>A2</b> | 122              | 22                                  | 10               | 26                     | 11                       | 0                  | 0                      | 1                 | 1                  |
| 05/06/2013    | <b>A3</b> | 120              | 16                                  | 16               | 21                     | 12                       | 0                  | 0                      | 0                 | 0                  |
| 08/05/2013    | <b>A4</b> | 131              | 1                                   | 1                | 11                     | 1                        | 0                  | 0                      | 0                 | 0                  |
| 03/06/2013    | <b>A5</b> | 120              | 3                                   | 11               | 6                      | 0                        | 0                  | 0                      | 0                 | 0                  |
| 09/04/2013    | <b>C1</b> | 115              | 15                                  | 3                | 21                     | 3                        | 0                  | 1                      | 2                 | 2                  |
| 18/06/2013    | <b>C2</b> | 129              | 12                                  | 1                | 3                      | 2                        | 0                  | 0                      | 3                 | 1                  |
| 31/05/2013    | <b>C3</b> | 102              | 4                                   | 0                | 3                      | 0                        | 0                  | 0                      | 0                 | 0                  |
| 21/04/2013    | <b>C4</b> | 100              | 12                                  | 6                | 16                     | 4                        | 0                  | 0                      | 0                 | 0                  |
| 08/06/2013    | <b>C5</b> | 120              | 4                                   | 0                | 5                      | 1                        | 0                  | 0                      | 0                 | 0                  |
| 29/05/2013    | <b>S1</b> | 131              | 4                                   | 1                | 1                      | 0                        | 0                  | 0                      | 0                 | 0                  |
| 11/04/2013    | <b>S2</b> | 175              | 2                                   | 14               | 20                     | 6                        | 0                  | 0                      | 0                 | 0                  |
| 14/06/2013    | <b>S3</b> | 41               | 3                                   | 15               | 3                      | 6                        | 0                  | 1                      | 0                 | 0                  |
| 16/06/2013    | <b>S4</b> | 120              | 10                                  | 3                | 2                      | 5                        | 0                  | 0                      | 0                 | 0                  |
| 21/06/2013    | <b>S5</b> | 128              | 17                                  | 15               | 19                     | 16                       | 0                  | 0                      | 0                 | 0                  |
| 30/04/2013    | <b>U1</b> | 102              | 0                                   | 4                | 11                     | 4                        | 0                  | 0                      | 0                 | 0                  |
| 29/04/2013    | <b>U2</b> | 113              | 0                                   | 0                | 5                      | 0                        | 0                  | 0                      | 0                 | 0                  |
| 27/05/2013    | <b>U3</b> | 135              | 1                                   | 2                | 9                      | 0                        | 0                  | 0                      | 0                 | 3                  |

---

**Spring, 2013 cont.**

| Date Surveyed | Site Code  | Total Survey Min | <i>Relative activity (1-min intervals)</i> |                  |                        |                          |                    |                        |                   |                    |
|---------------|------------|------------------|--------------------------------------------|------------------|------------------------|--------------------------|--------------------|------------------------|-------------------|--------------------|
|               |            |                  | <i>H. savii</i>                            | <i>P. kuhlii</i> | <i>P. pipistrellus</i> | <i>Pipistrellus</i> spp. | <i>P. gaisleri</i> | <i>R. hipposideros</i> | <i>M. punicus</i> | <i>T. teniotis</i> |
| 10/05/2013    | <b>U4</b>  | 93               | 1                                          | 8                | 2                      | 1                        | 0                  | 0                      | 0                 | 5                  |
| 07/06/2013    | <b>U5</b>  | 123              | 21                                         | 17               | 30                     | 11                       | 0                  | 1                      | 0                 | 5                  |
| 14/05/2013    | <b>V1</b>  | 103              | 6                                          | 42               | 6                      | 2                        | 2                  | 0                      | 2                 | 0                  |
| 09/05/2013    | <b>V10</b> | 94               | 3                                          | 0                | 21                     | 9                        | 0                  | 0                      | 0                 | 0                  |
| 18/04/2013    | <b>V11</b> | 123              | 1                                          | 1                | 47                     | 9                        | 1                  | 0                      | 0                 | 0                  |
| 05/05/2013    | <b>V3</b>  | 123              | 3                                          | 12               | 12                     | 1                        | 0                  | 0                      | 0                 | 0                  |
| 27/04/2013    | <b>V9</b>  | 70               | 0                                          | 0                | 5                      | 0                        | 0                  | 0                      | 0                 | 0                  |
| 16/05/2013    | <b>V2</b>  | 131              | 5                                          | 5                | 31                     | 6                        | 1                  | 1                      | 0                 | 3                  |
| 30/05/2013    | <b>V5</b>  | 99               | 20                                         | 38               | 16                     | 12                       | 0                  | 0                      | 0                 | 2                  |
| 04/06/2013    | <b>V6</b>  | 120              | 19                                         | 25               | 10                     | 6                        | 0                  | 0                      | 0                 | 0                  |
| 01/05/2013    | <b>V7</b>  | 117              | 27                                         | 49               | 34                     | 17                       | 0                  | 0                      | 0                 | 0                  |
| 02/05/2013    | <b>V8</b>  | 132              | 27                                         | 0                | 2                      | 2                        | 5                  | 0                      | 0                 | 0                  |
| 28/05/2013    | <b>W1</b>  | 125              | 0                                          | 4                | 14                     | 6                        | 0                  | 0                      | 0                 | 0                  |
| 18/05/2013    | <b>W2</b>  | 129              | 3                                          | 2                | 6                      | 4                        | 0                  | 0                      | 0                 | 0                  |
| 19/04/2013    | <b>W3</b>  | 127              | 2                                          | 2                | 5                      | 0                        | 0                  | 0                      | 0                 | 0                  |
| 13/04/2013    | <b>W4</b>  | 113              | 4                                          | 1                | 1                      | 0                        | 0                  | 0                      | 3                 | 0                  |
| 20/04/2013    | <b>W5</b>  | 113              | 4                                          | 9                | 4                      | 1                        | 0                  | 0                      | 0                 | 0                  |

---
