# Supplementary material
Source: publisher figshare collection journal article supplement (https://tandf.figshare.com/articles/dataset/_/6321782)
Supplement: Supplementary file 3 [file 1]

Table S2: Details of mist netting locations on the island of Malta and the dates each site was visited.

| Site Name      | Land cover type | GPS Coordinates |            | Dates                                                                                                                      |
|----------------|-----------------|-----------------|------------|----------------------------------------------------------------------------------------------------------------------------|
| Mtahleb        | Cliff           | 35.87035N       | 14.35406E  | 16/07/2013<br>11/08/2013                                                                                                   |
| Mizieb         | Woodland        | 35.94583N       | 14.36937E  | 28/08/2013<br>27/08/2013<br>28/08/2013                                                                                     |
| Buskett        | Woodland        | 35.85874N       | 14.40162E  | 15/08/2013<br>08/08/2013<br>07/08/2013<br>03/08/2013<br>01/08/2013<br>31/07/2013<br>17/08/2013<br>06/08/2013<br>30/09/2014 |
| Wied Qirda     | Valley          | 35.86255N       | 14.46874E  | 12/07/2013                                                                                                                 |
| Wied Ghollieqa | Valley          | 35.90454N       | 14.48367E  | 18/08/2013                                                                                                                 |
| Chadwick Lakes | Valley          | 35.89190N       | 14.38907E  | 15/07/2013<br>23/08/2013                                                                                                   |
| Maqluba        | Valley          | 35.83108N       | 14.45704E  | 25/08/2013<br>20/08/2013<br>16/09/2014                                                                                     |
| Dwejra         | Cliff           | 35.90548N       | 14.38012E  | 02/10/2014                                                                                                                 |
| Għajn Tuffieħa | Shrubland       | 35.92801N       | 14.34712E  | 19/10/2014                                                                                                                 |
| Għarghur       | Cliff           | 35.92986N       | 14.44902E  | 18/10/2014<br>15/06/2015                                                                                                   |
| Rabat          | Shrubland       | 35.87427N       | 14.387116E | 25/02/2017<br>24/05/2017                                                                                                   |
| Imtarfa        | Woodland        | 35.89350N       | 14.402810E | 02/03/2017<br>27/05/2017<br>29/05/2017<br>14/06/2017                                                                       |
| Buskett        | Woodland        | 35.85587N       | 14.395340E | 07/04/2017<br>02/06/2017                                                                                                   |
