# Supplementary material
Source: publisher figshare collection journal article supplement (https://tandf.figshare.com/articles/dataset/_/6321782)
Supplement: Supplementary file 4 [file 1]

# Supplementary material:

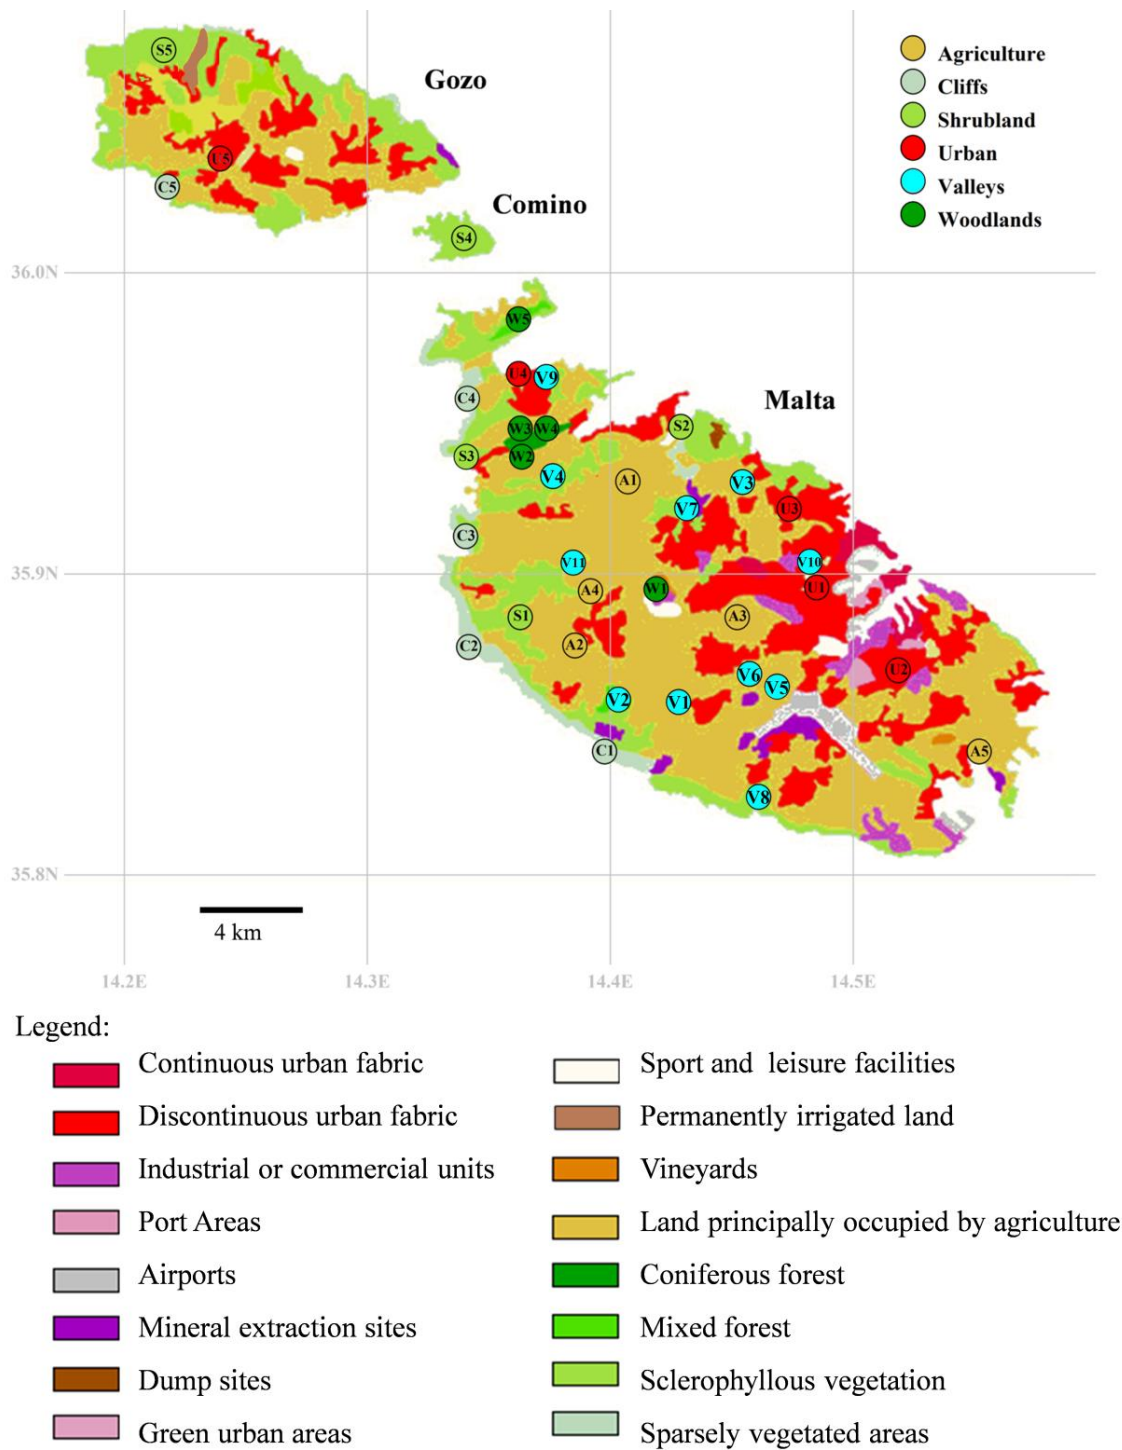

Figure S1: CORINE 2006 Land Cover Map of the Maltese Islands (legend below the map showing the CLC classes) and the 36 acoustic survey sites with their corresponding site code and major land cover type (survey site circle is at the centre of the 1 km<sup>2</sup> grid square, colour corresponds to the major land cover type with the corresponding legend at the top right-hand corner). Map produced using DMAP v7.4 software.
